# Supplementary material for: Chemoselective synthesis of macrocyclic poly(methylvinylsiloxane)s via metathetical ring-expanding polymerization of oligomeric cyclosiloxanes by sequential (MeVinylSi-O-) insertion reactions
Source: Royal Society of Chemistry journal article supplement (doi:10.1039/c6py01841f), 2017-01-01
Supplement: c6py01841f1.pdf [file c6py01841f1.pdf]

## Supporting Information

### Chemoselective Synthesis of Macrocyclic Poly(methylvinylsiloxane)s via Metathetical Ring-expanding Polymerization of Oligomeric Cyclosiloxanes by Sequential (MeVinylSi-O-) Insertion Reactions

Ze Li,<sup>a,\*</sup> Chunyong Wu,<sup>a</sup> Lifeng Liu,<sup>a</sup> Meijiang Li,<sup>a</sup> Xiongfa Yang,<sup>a</sup> Chaowei Hao,<sup>a</sup> Qiu  
Chen,<sup>a</sup> Ziqiang Hu,<sup>a</sup> Mengxian Luo,<sup>a</sup> Guoqiao Lai,<sup>a,\*</sup> and Tien-Yau Luh<sup>b</sup>

*a.* Key Laboratory of Organosilicon Chemistry and Material Technology of Ministry of Education,  
Hangzhou Normal University, 1378 west Wenyi Road, Hangzhou 311121, China.

*b.* Department of Chemistry, National Taiwan University, Taipei 106, Taiwan

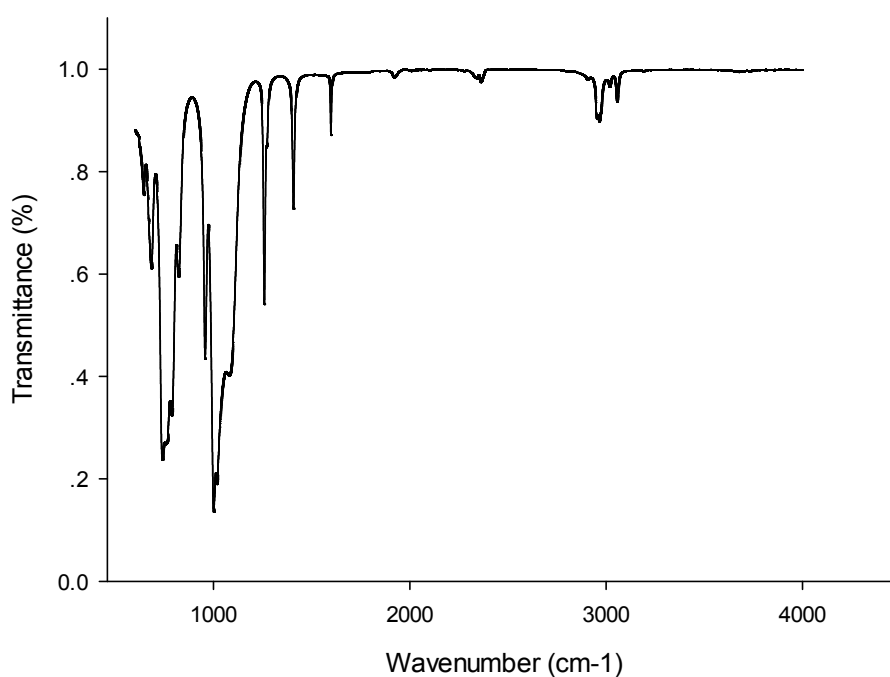

**Figure S1** IR spectrum of cPMVS

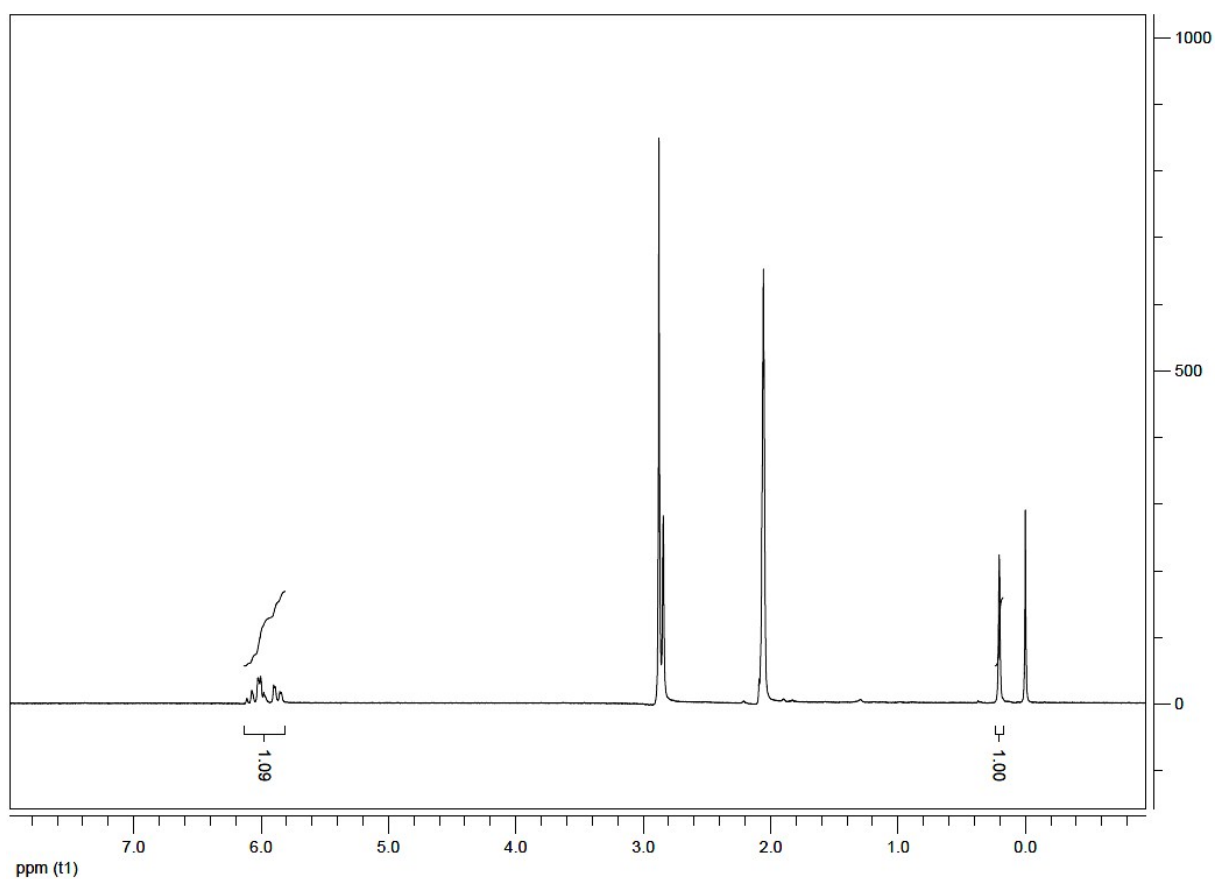

**Figure S2**  $^1\text{H}$ -NMR spectrum (carried out in Acetone- $d_6$ ) of the product of cPMVS and dimethylphenylchlorosilane in presence of triethylamine

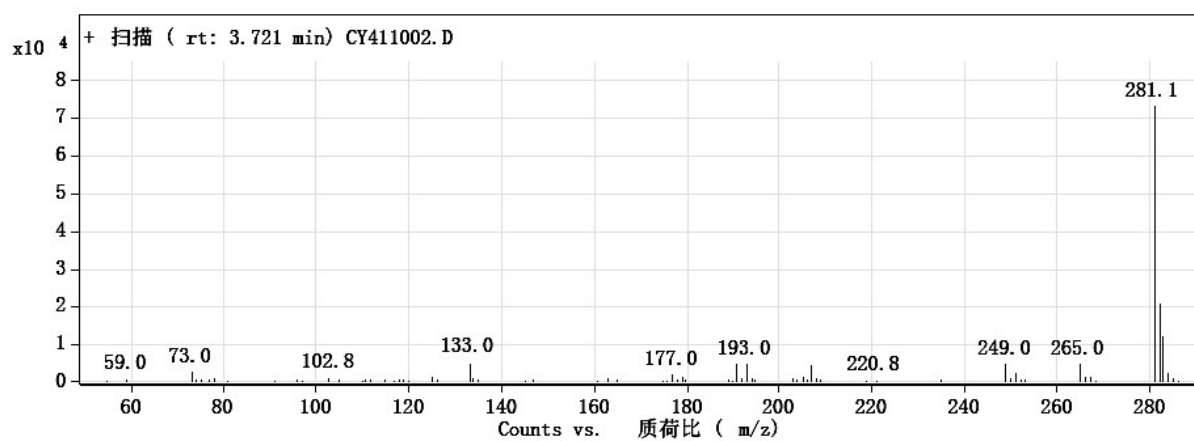

**Figure S3** Mass spectrum of  $\text{D}_4^{\text{Me}}$

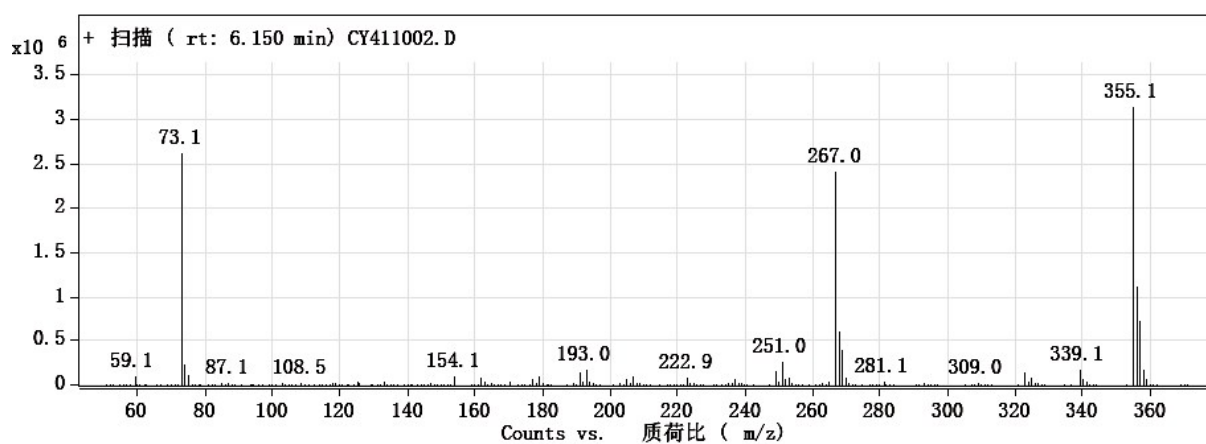

Figure S4 Mass spectrum of D<sub>5</sub><sup>Me</sup>

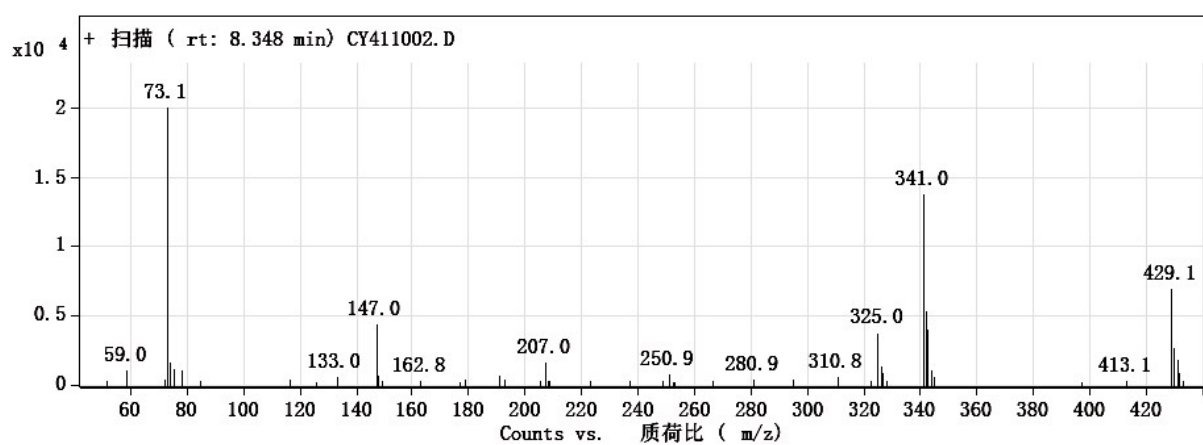

Figure S5 Mass spectrum of D<sub>6</sub><sup>Me</sup>

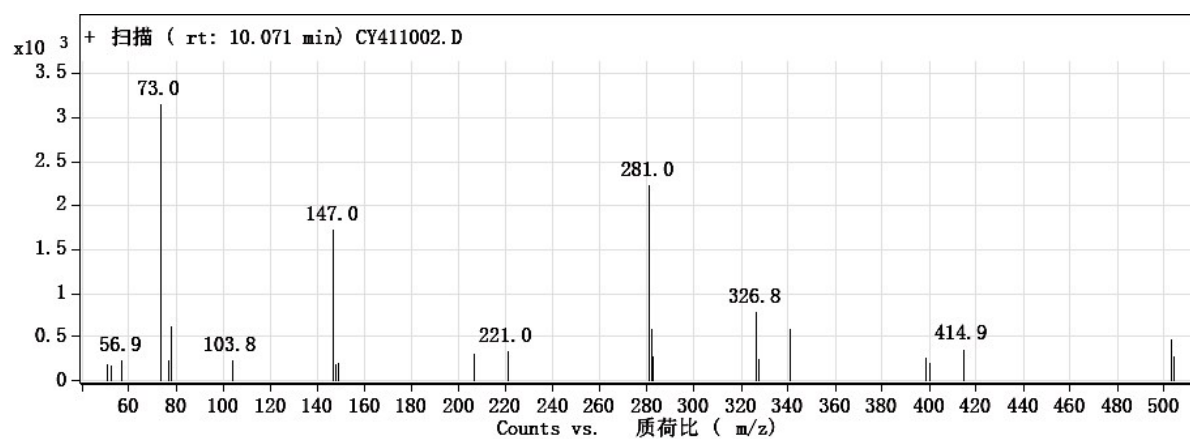

Figure S6 Mass spectrum of D<sub>7</sub><sup>Me</sup>

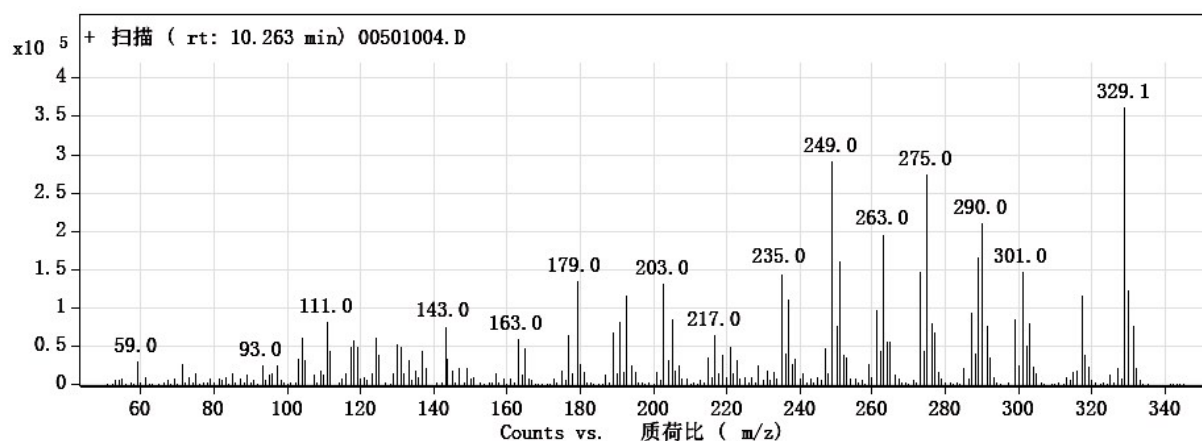

Figure S7 Mass spectrum of D<sub>4</sub><sup>Vi</sup>

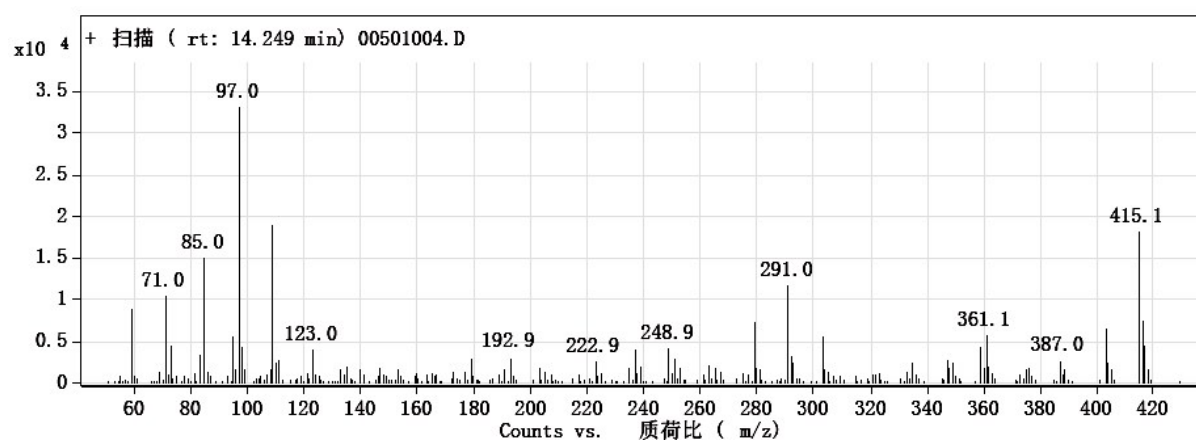

Figure S8 Mass spectrum of D<sub>5</sub><sup>Vi</sup>

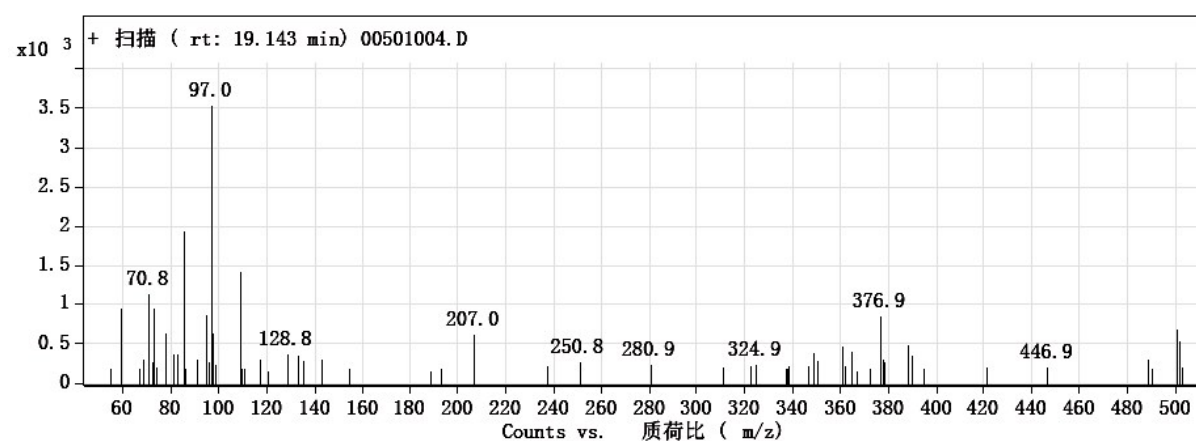

Figure S9 Mass spectrum of D<sub>6</sub><sup>Vi</sup>
